# Supplementary material
Source: PubMed Central journal article supplement (PMC4425581)
Supplement: NIHMS640445-supplement-supplement_1.pdf [file NIHMS640445-supplement-supplement_1.pdf]

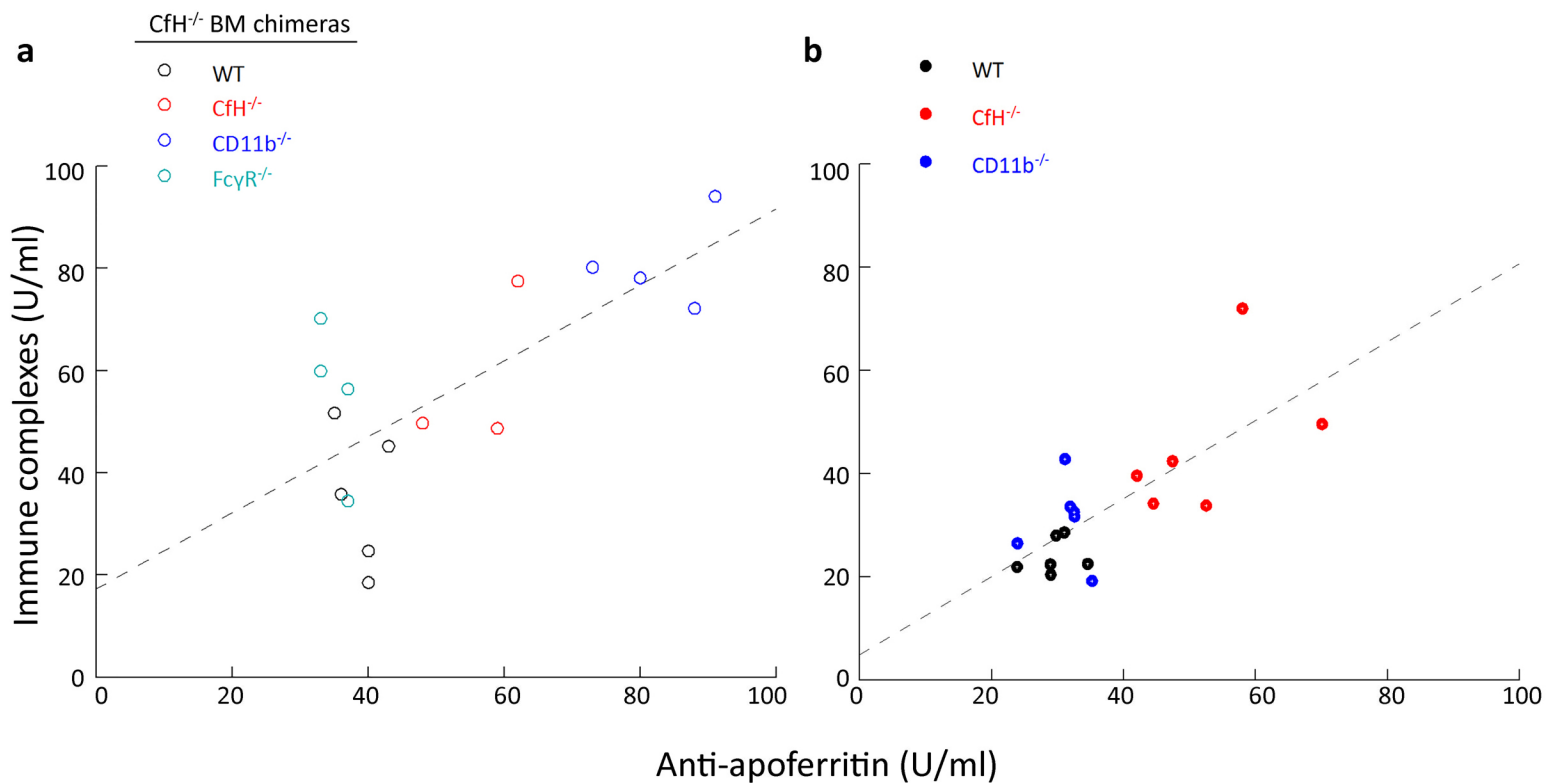

**Figure S1.** Positive correlation between plasma free immune complexes and anti-apoferritin IgG levels in CSS induced in CfH<sup>-/-</sup> mice chimeric for the indicated bone marrow (**a**) and in those without BM transfers (**b**).

The lines fit by least squares analysis were:

(a) ICs = 17.3 + 0.743 x anti-apoferritin,  $R = 0.71$ ,  $P = 0.002$ ;

(b) ICs = 4.8 + 0.759 x anti-apoferritin,  $R = 0.73$ ,  $P = 0.001$ .

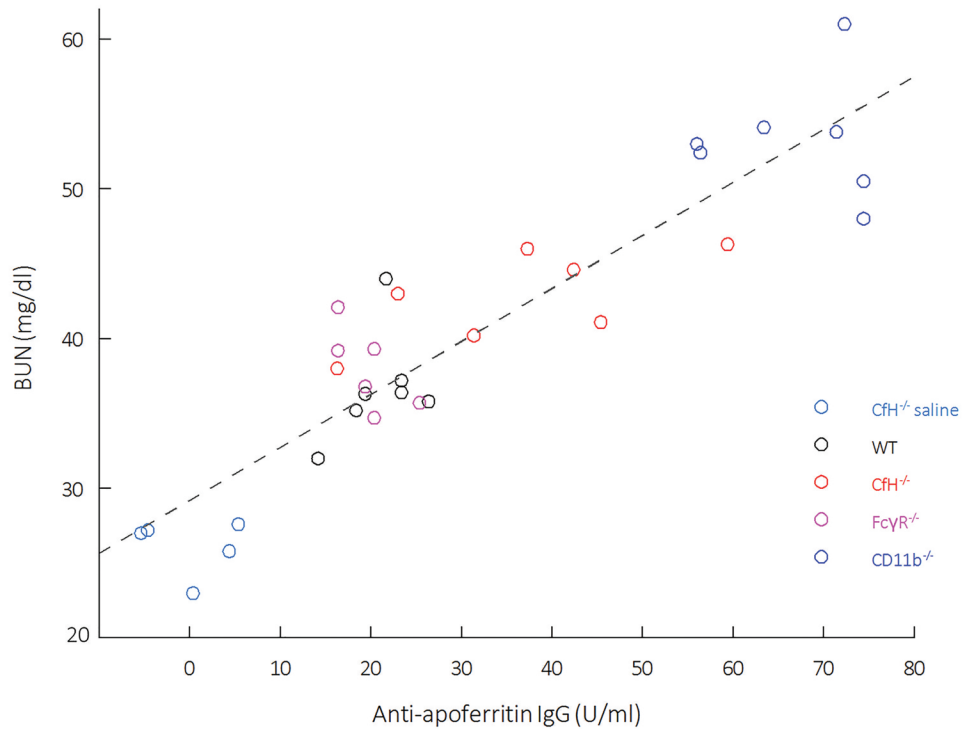

**Figure S2.** Positive correlation between measured BUN values and anti-apoferritin IgG levels. The line fit by least squares analysis was  $BUN = 29.3 + (35.4 \times \text{anti-apoferritin})$ .  $R = 0.91$ ,  $P < 0.001$ .

The other significant correlations among disease measures were:  
 $BUN = 20.9 + (0.47 \times \text{urinary albumin})$ .  $R = 0.97$ ,  $P < 0.001$ ;  
 $BUN = 26.8 + (8.16 \times \text{GN score})$ .  $R = 0.86$ ,  $P = 0.002$ ; and,  
 $\text{Urinary albumin} = 15.3 + (16.1 \times \text{GN score})$ .  $R = 0.81$ ,  $P = 0.004$ .

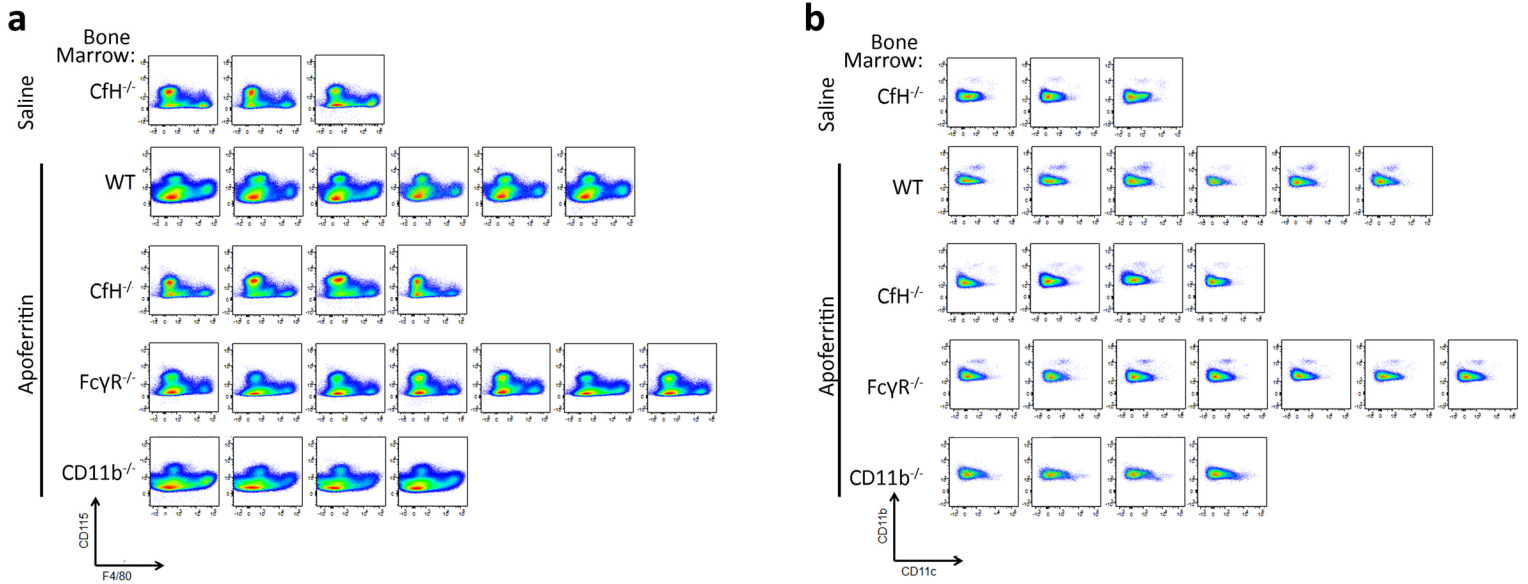

**Figure S3.** Analysis of CD3<sup>-</sup>CD19<sup>-</sup> cells by flow cytometry. Cells were from kidneys of CfH<sup>-/-</sup> mice chimeric for wildtype (WT), CfH<sup>-/-</sup>, FcγR<sup>-/-</sup>, and CD11b<sup>-/-</sup> bone marrow immunized for 5 weeks with apoferritin, or saline as control. (a) Data for CD115 (y-axis) and F4/80 (x-axis). (b) CD115<sup>+</sup> cells were analyzed for CD11b (y-axis) and CD11c (x-axis).

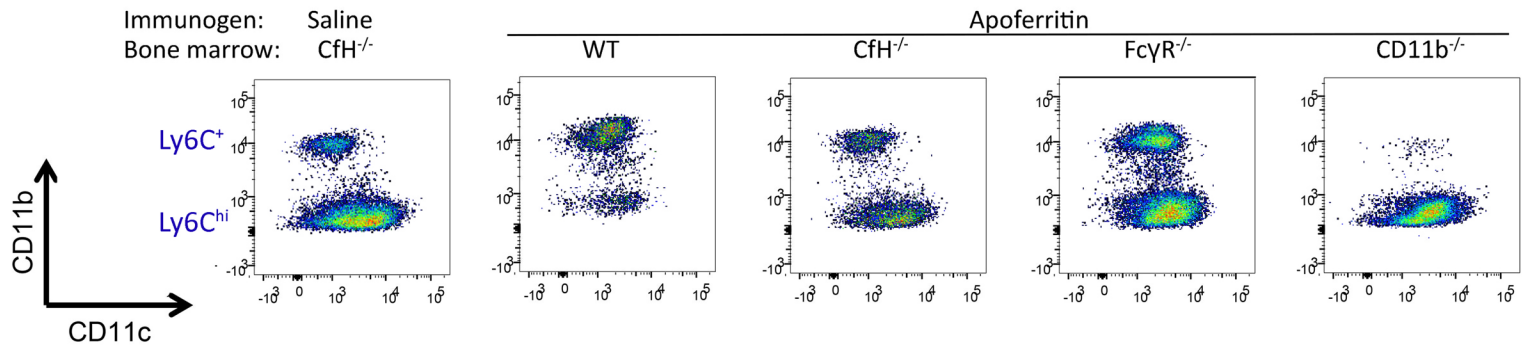

**Figure S4.** Analysis of F4/80<sup>+</sup>Ly6C<sup>+</sup>CCR2<sup>-</sup> cells by flow cytometry. Cells were from kidneys of CfH<sup>-/-</sup> mice chimeric for wildtype (WT), CfH<sup>-/-</sup>, FcγR<sup>-/-</sup>, and CD11b<sup>-/-</sup> bone marrow immunized for 5 weeks with apoferritin, or saline as control. Representative data for CD11b (y-axis) and CD11c (x-axis) are shown. Ly6C<sup>hi</sup> cells were CD11b<sup>-</sup>, while Ly6C<sup>+</sup> cells were CD11b<sup>+</sup>, except in the CD11b<sup>-/-</sup> chimeras.

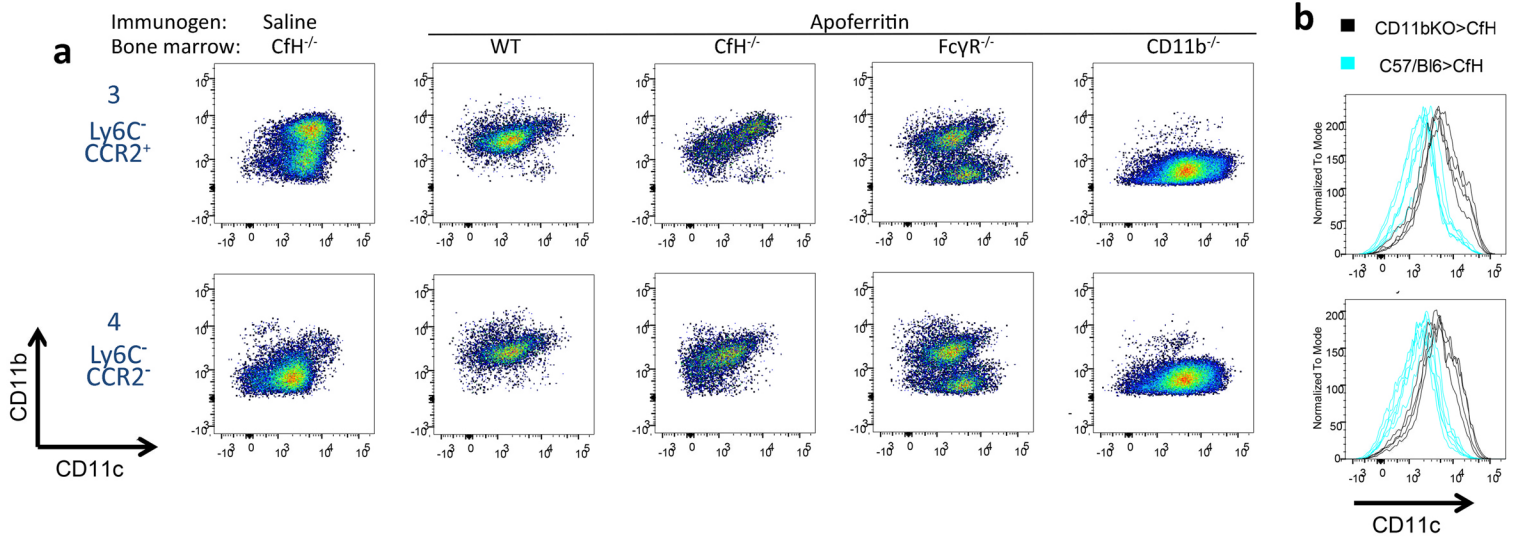

**Figure S5.** Analysis of F4/80<sup>+</sup>Ly6C<sup>-</sup> cells for CD11b and CD11c by flow cytometry. Cells were from kidneys of Cfh<sup>-/-</sup> mice chimeric for wildtype (WT), Cfh<sup>-/-</sup>, FcγR<sup>-/-</sup>, and CD11b<sup>-/-</sup> bone marrow immunized for 5 weeks with apoferritin, or saline as control. CCR2<sup>+</sup> and CCR2<sup>-</sup> cells were analyzed separately; these are from quadrants 3 and 4, respectively, from Figure 4. (a) Representative data for CD11b (y-axis) and CD11c (x-axis) are shown. (b) CD11c expression is shown in histograms for all wildtype and CD11b<sup>-/-</sup> chimeras.
